# Supplementary material for: Race and Rehabilitation Destination After Elective Total Hip Arthroplasty: Analysis of a Large Regional Data Set
Source: PubMed Central journal article supplement — Geriatr Orthop Surg Rehabil. 2017 Sep 8;8(4):192–201. doi: 10.1177/2151458517726409 (PMC5755837; doi:10.1177/2151458517726409), 2017-09-08
Supplement: Supp_1_THR_Race_Rehab_Readmission_051017.pdf [file Supp_1_THR_Race_Rehab_Readmission_051017.pdf]

## SUPPLEMENT

### Supplement 1. Comorbidity definitions (ICD-9-CM codes)

| Elixhauser comorbidity                  | ICD-9-CM (Quan <sup>26</sup> )                                                                                                          | ICD-9-CM (Quan <sup>26</sup> + changes from AHRQ <sup>27</sup> V2.1, 3.0-3.7)                                                                                                                                                                     |
|-----------------------------------------|-----------------------------------------------------------------------------------------------------------------------------------------|---------------------------------------------------------------------------------------------------------------------------------------------------------------------------------------------------------------------------------------------------|
| Congestive heart failure (CHF)          | 398.91, 402.01, 402.11, 402.91, 404.01, 404.03, 404.11, 404.13, 404.91, 404.93, 425.4-425.9, 428.x                                      | No change                                                                                                                                                                                                                                         |
| Cardiac arrhythmias                     | 426.0, 426.13, 426.7, 426.9, 426.10, 426.12, 427.0-427.4, 427.6-427.9, 785.0, 996.01, 996.04, V45.0, V53.3                              | No change                                                                                                                                                                                                                                         |
| Valvular disease                        | 093.2, 394.x-397.x, 424.x, 746.3-746.6, V42.2, V43.3                                                                                    | No change                                                                                                                                                                                                                                         |
| Pulmonary circulation disorders         | 415.0, 415.1, 416.x, 417.0, 417.8, 417.9                                                                                                | No change                                                                                                                                                                                                                                         |
| Peripheral vascular disorders           | 093.0, 437.3, 440.x, 441.x, 443.1-443.9, 447.1, 557.1, 557.9, V43.4                                                                     | <u>Add:</u> 442.0, 442.1, 442.2, 442.3, 442.81-442.84, 442.89, 442.9, 449.x                                                                                                                                                                       |
| Hypertension (combined)                 | 401.x (uncomplicated), 402.x-405.x (complicated)                                                                                        | <u>Add:</u> 642.00, 642.01, 642.02, 642.03, 642.04 (uncomplicated), 401.0, 437.2, 642.10-642.11, 642.13-642.14, 642.20-642.24, 642.70-642.74, 642.90-642.94 (complicated)                                                                         |
| Paralysis                               | 334.1, 342.x, 343.x, 344.0-344.6, 344.9                                                                                                 | <u>Add:</u> 438.20-438.22, 438.30-438.32, 438.40-438.42, 438.50-438.52, 780.72                                                                                                                                                                    |
| Other neurological disorders            | 331.9, 332.0, 332.1, 333.4, 333.5, 333.92, 334.x-335.x, 336.2, 340.x, 341.x, 345.x, 348.1, 348.3, 780.3, 784.3                          | <u>Add:</u> 330.0-330.3, 330.8-330.9, 331.0, 331.11, 331.19, 331.2-331.4, 331.7, 331.81-331.82, 331.89, 333.7, 333.85, 333.94, 338.0, 347.00, 347.01, 347.10, 347.11, 649.30-649.34, 768.7, 780.31, 780.32, 780.97<br><u>Remove:</u> 348.1, 348.3 |
| Chronic pulmonary disease               | 416.8, 416.9, 490.x-505.x, 506.4, 508.1, 508.8                                                                                          | No change                                                                                                                                                                                                                                         |
| Diabetes, uncomplicated                 | 250.0-250.3                                                                                                                             | <u>Add:</u> 249.00, 249.01, 249.10, 249.11, 249.20, 249.21, 249.30, 249.31                                                                                                                                                                        |
| Diabetes, complicated                   | 250.4-250.9                                                                                                                             | <u>Add:</u> 249.40, 249.41, 249.50, 249.51, 249.60, 249.61, 249.70, 249.71, 249.80, 249.81, 249.90, 249.91                                                                                                                                        |
| Hypothyroidism                          | 240.9, 243.x, 244.x, 246.1, 246.8                                                                                                       | No change                                                                                                                                                                                                                                         |
| Renal failure                           | 403.01, 403.11, 403.91, 404.02, 404.03, 404.13, 404.92, 404.93, 585.x, 586.x, 588.0, V42.0, V45.1, V56.x                                | No change                                                                                                                                                                                                                                         |
| Liver disease                           | 070.22, 070.23, 070.32, 070.33, 070.44, 070.54, 070.6, 070.9, 456.0-456.2, 570.x, 571.x, 572.2-572.8, 573.3, 573.4, 573.8, 573.9, V42.7 | <u>Add:</u> 573.9                                                                                                                                                                                                                                 |
| Peptic ulcer disease excluding bleeding | 531.7, 531.9, 532.7, 532.9, 533.7, 533.9, 534.7, 534.9                                                                                  | <u>Add:</u> 531.41, 531.51, 531.61, 532.41, 532.51, 532.61, 533.41, 533.51, 533.61, 534.41, 534.51, 534.61                                                                                                                                        |
| AIDS/HIV                                | 042.x-044.x                                                                                                                             | No change                                                                                                                                                                                                                                         |
| Lymphoma                                | 200.x-202.x, 203.0, 238.6                                                                                                               | <u>Add:</u> 203.12, 203.82                                                                                                                                                                                                                        |
| Metastatic cancer                       | 196.x-199.x                                                                                                                             | <u>Add:</u> 209.70-209.75, 209.79, 789.51                                                                                                                                                                                                         |
| Solid tumor without                     | 140.x-172.x, 174.x-195.x                                                                                                                | <u>Add:</u> 209.00-209.03, 209.10-209.17,                                                                                                                                                                                                         |

|                                                         |                                                                                                            |                                                            |
|---------------------------------------------------------|------------------------------------------------------------------------------------------------------------|------------------------------------------------------------|
| metastasis                                              |                                                                                                            | 209.20-209.27, 209.29, 209.30-209.36,<br>258.01-258.03     |
| Rheumatoid arthritis /<br>collagen vascular<br>diseases | 446.x, 701.0, 710.0-710.4, 710.8, 710.9, 711.2,<br>714.x, 719.3, 720.x, 725.x, 728.5, 728.89,<br>729.30    | No change                                                  |
| Coagulopathy                                            | 286.x, 287.1, 287.3-287.5                                                                                  | <u>Add:</u> 289.84, 649.30-649.34                          |
| Obesity                                                 | 278.0                                                                                                      | <u>Add:</u> V85.3, V85.4, 649.10-649.14,<br>793.91, V85.54 |
| Weight loss                                             | 260.x-263.x, 783.2, 799.4                                                                                  | No change                                                  |
| Fluid and electrolyte<br>disorders                      | 253.6, 276.x                                                                                               | No change                                                  |
| Blood loss anemia                                       | 280.0                                                                                                      | <u>Add:</u> 648.20-648.24                                  |
| Deficiency anemia                                       | 280.1-280.9, 281.x                                                                                         | <u>Add:</u> 285.21, 285.22, 285.29                         |
| Alcohol abuse                                           | 265.2, 291.1-291.3, 291.5-291.9, 303.0, 303.9,<br>305.0, 357.5, 425.5, 535.3, 571.0-571.3, 980.x,<br>V11.3 | <u>Add:</u> 291.0<br><u>Remove:</u> V11.3                  |
| Drug abuse                                              | 292.x, 304.x, 305.2-305.9, V65.42                                                                          | <u>Add:</u> 648.30-648.34                                  |
| Psychoses                                               | 293.8, 295.x, 296.04, 296.14, 296.44, 296.54,<br>297.x, 298.x                                              | No change                                                  |
| Depression                                              | 296.2, 296.3, 296.5, 300.4, 309.x, 311                                                                     | No change                                                  |

---
