# Supplementary material for: Race and Rehabilitation Destination After Elective Total Hip Arthroplasty: Analysis of a Large Regional Data Set
Source: PubMed Central journal article supplement — Geriatr Orthop Surg Rehabil. 2017 Sep 8;8(4):192–201. doi: 10.1177/2151458517726409 (PMC5755837; doi:10.1177/2151458517726409), 2017-09-08
Supplement: Supp_2_THR_Race_Rehab_Readmission_051017.pdf [file Supp_2_THR_Race_Rehab_Readmission_051017.pdf]

**Supplement 2. Baseline Characteristics by 90 Day Hospital Readmission Status\***

|                                                    | <65 years               |                                 |   | ≥65 years               |                                 |   |
|----------------------------------------------------|-------------------------|---------------------------------|---|-------------------------|---------------------------------|---|
|                                                    | Readmitted<br>(N=3,191) | Not<br>Readmitted<br>(N=28,701) |   | Readmitted<br>(N=5,728) | Not<br>Readmitted<br>(N=30,396) |   |
| Sex, n (%) female                                  | 1,572 (49.3)            | 13,576 (47.3)                   |   | 3,672 (64.1)            | 18,888 (62.1)                   | ‡ |
| Race, n (%) African-American                       | 467 (14.6)              | 2,470 (8.6)                     | † | 289 (5.0)               | 1,165 (3.8)                     | ‡ |
| Age, n (%)                                         |                         |                                 | † |                         |                                 |   |
| <45 years                                          | 415 (13.0)              | 2,964 (10.3)                    |   |                         |                                 |   |
| 45-54 years                                        | 998 (31.3)              | 9,451 (32.9)                    |   |                         |                                 |   |
| 55-64 years                                        | 1,778 (55.7)            | 16,286 (56.7)                   |   |                         |                                 |   |
| 65-74 years                                        |                         |                                 |   | 2,290 (40.0)            | 15,909 (52.3)                   | † |
| 75-84 years                                        |                         |                                 |   | 2,560 (44.7)            | 12,021 (39.5)                   |   |
| ≥85 years                                          |                         |                                 |   | 878 (15.3)              | 2,466 (8.1)                     |   |
| Insurance Type, n (%)                              |                         |                                 | † |                         |                                 | † |
| Medicaid                                           | 447 (14.0)              | 2,055 (7.2)                     |   | 12 (0.2)                | 52 (0.2)                        |   |
| Medicare / Government                              | 683 (21.4)              | 3,216 (11.2)                    |   | 5,278 (92.1)            | 27,068 (89.1)                   |   |
| Private                                            | 2,061 (64.6)            | 23,430 (81.6)                   |   | 438 (7.6)               | 3,276 (10.8)                    |   |
| Metro Area (facility level), n (%)                 | 3,000 (94.0)            | 26,956 (93.9)                   |   | 5,271 (92.0)            | 27,886 (91.7)                   |   |
| Fiscal Year, n (%)                                 |                         |                                 |   |                         |                                 | ‡ |
| FY2008 (7/1/07-6/30/08)                            | 658 (20.6)              | 5,190 (18.1)                    |   | 1,204 (21.0)            | 5,885 (19.4)                    |   |
| FY2009 (7/1/08-6/30/09)                            | 650 (20.4)              | 5,725 (19.9)                    |   | 1,224 (21.4)            | 6,195 (20.4)                    |   |
| FY2010 (7/1/09-6/30/10)                            | 649 (20.3)              | 6,239 (21.7)                    |   | 1,228 (21.4)            | 6,635 (21.8)                    |   |
| FY2011 (7/1/10-6/30/11)                            | 691 (21.7)              | 6,420 (22.4)                    |   | 1,107 (19.3)            | 6,562 (21.6)                    |   |
| FY2012 (7/1/11-3/31/12)                            | 543 (17.0)              | 5,127 (17.9)                    |   | 965 (16.8)              | 5,119 (16.8)                    |   |
| Volume of Cases (by facility & fiscal year), n (%) |                         |                                 | † |                         |                                 | ‡ |
| <100 / year                                        | 794 (24.9)              | 5,656 (19.7)                    |   | 1,649 (28.8)            | 7,372 (24.3)                    |   |
| 100-199 / year                                     | 797 (25.0)              | 7,362 (25.7)                    |   | 1,741 (30.4)            | 9,198 (30.3)                    |   |
| 200+ / year                                        | 1,600 (50.1)            | 15,683 (54.6)                   |   | 2,338 (40.8)            | 13,826 (45.5)                   |   |
| Complications, n (%)                               |                         |                                 |   |                         |                                 |   |
| Venous Thromboembolism                             | 30 (0.9)                | 95 (0.3)                        | † | 57 (1.0)                | 178 (0.6)                       | † |
| Postoperative Myocardial Infarction                | 3 (0.1)                 | 7 (<0.1)                        |   | 33 (0.6)                | 53 (0.2)                        | † |
| Prosthetic Device Complication                     | 43 (1.3)                | 118 (0.4)                       | † | 139 (2.4)               | 310 (1.0)                       | † |
| Surgical wound infection                           | 8 (0.3)                 | 55 (0.2)                        |   | 25 (0.4)                | 60 (0.2)                        | ‡ |
| Comorbidities, n (%)                               |                         |                                 |   |                         |                                 |   |
| Congestive heart failure                           | 108 (3.4)               | 369 (1.3)                       | † | 471 (8.2)               | 1,223 (4.0)                     | † |
| Cardiac arrhythmias                                | 267 (8.4)               | 1,823 (6.4)                     | ‡ | 1,213 (21.2)            | 4,474 (14.7)                    | † |
| Valvular disease                                   | 64 (2.0)                | 655 (2.3)                       |   | 344 (6.0)               | 1,594 (5.2)                     | ‡ |
| Pulmonary circulation disorders                    | 35 (1.1)                | 139 (0.5)                       | † | 124 (2.2)               | 341 (1.1)                       | † |
| Peripheral vascular disorders                      | 59 (1.8)                | 233 (0.8)                       | † | 257 (4.5)               | 908 (3.0)                       | † |
| Hypertension                                       | 1,612 (50.5)            | 13,521 (47.1)                   | ‡ | 3,525 (61.5)            | 19,546 (64.3)                   | † |
| Paralysis                                          | 27 (0.8)                | 82 (0.3)                        | † | 56 (1.0)                | 93 (0.3)                        | † |
| Other neurological disorders                       | 135 (4.2)               | 758 (2.6)                       | † | 299 (5.2)               | 1,031 (3.4)                     | † |
| Chronic pulmonary disease                          | 624 (19.6)              | 3,686 (12.8)                    | † | 1,089 (19.0)            | 4,181 (13.8)                    | † |
| Diabetes, uncomplicated                            | 477 (14.9)              | 2,852 (9.9)                     | † | 1,109 (19.4)            | 4,738 (15.6)                    | † |
| Diabetes, complicated                              | 70 (2.2)                | 226 (0.8)                       | † | 128 (2.2)               | 429 (1.4)                       | † |
| Hypothyroidism                                     | 304 (9.5)               | 2,661 (9.3)                     |   | 1,027 (17.9)            | 4,955 (16.3)                    | ‡ |
| Renal failure                                      | 108 (3.4)               | 420 (1.5)                       | † | 480 (8.4)               | 1,382 (4.5)                     | † |
| Liver disease                                      | 86 (2.7)                | 400 (1.4)                       | † | 49 (0.9)                | 183 (0.6)                       | ‡ |
| Peptic ulcer disease excluding bleeding            | 11 (0.3)                | 107 (0.4)                       |   | 48 (0.8)                | 175 (0.6)                       | ‡ |
| AIDS/HIV                                           | 16 (0.5)                | 47 (0.2)                        | † | 0 (0.0)                 | 0 (0.0)                         |   |
| Lymphoma                                           | 17 (0.5)                | 86 (0.3)                        | ‡ | 47 (0.8)                | 124 (0.4)                       | † |

|                                        |              |               |   |              |               |   |
|----------------------------------------|--------------|---------------|---|--------------|---------------|---|
| Metastatic cancer                      | 36 (1.1)     | 64 (0.2)      | † | 52 (0.9)     | 90 (0.3)      | † |
| Solid tumor (without metastasis)       | 16 (0.5)     | 75 (0.3)      | ‡ | 60 (1.0)     | 204 (0.7)     | ‡ |
| Rheumatoid arthritis/collagen vascular | 201 (6.3)    | 979 (3.4)     | † | 274 (4.8)    | 1,080 (3.6)   | † |
| Coagulopathy                           | 80 (2.5)     | 410 (1.4)     | † | 146 (2.5)    | 621 (2.0)     |   |
| Obesity                                | 718 (22.5)   | 5,239 (18.3)  | † | 626 (10.9)   | 3,049 (10.0)  | ‡ |
| Weight loss                            | 32 (1.0)     | 61 (0.2)      | † | 60 (1.0)     | 175 (0.6)     | † |
| Fluid and electrolyte disorders        | 262 (8.2)    | 1,584 (5.5)   | † | 714 (12.5)   | 2,845 (9.4)   | † |
| Blood loss anemia                      | 43 (1.3)     | 429 (1.5)     |   | 134 (2.3)    | 558 (1.8)     | ‡ |
| Deficiency anemia                      | 64 (2.0)     | 316 (1.1)     | † | 157 (2.7)    | 566 (1.9)     | † |
| Alcohol abuse                          | 113 (3.5)    | 618 (2.2)     | † | 46 (0.8)     | 193 (0.6)     |   |
| Drug abuse                             | 92 (2.9)     | 295 (1.0)     | † | 51 (0.9)     | 181 (0.6)     | ‡ |
| Psychoses                              | 32 (1.0)     | 106 (0.4)     | † | 41 (0.7)     | 101 (0.3)     | † |
| Depression                             | 588 (18.4)   | 3,847 (13.4)  | † | 636 (11.1)   | 2,681 (8.8)   | † |
| Discharge Facility Type, n (%)         |              |               | † |              |               | † |
| Inpatient Rehab Facility (IRF)         | 583 (18.3)   | 1,365 (4.8)   |   | 2,137 (37.3) | 4,234 (13.9)  |   |
| Skilled Nursing Facility (SNF)         | 695 (21.8)   | 3,584 (12.5)  |   | 2,082 (36.3) | 10,305 (33.9) |   |
| Home Health Care                       | 1,447 (45.3) | 17,589 (61.3) |   | 1,166 (20.4) | 12,267 (40.4) |   |
| Home Self-Care                         | 466 (14.6)   | 6,163 (21.5)  |   | 343 (6.0)    | 3,590 (11.8)  |   |

\* Variables were compared by 90-day hospital readmission status for each age group (<65 vs. ≥65 years) using Wald  $\chi^2$  test from unadjusted binary or multinomial logistic regression models that account for clustering by facility

† p<0.001

‡ p<0.05

FY=Fiscal year
